# Supplementary material for: Long-term woodland restoration on lowland farmland through passive rewilding
Source: PLoS One. 2021 Jun 16;16(6):e0252466. doi: 10.1371/journal.pone.0252466 (PMC8208563; doi:10.1371/journal.pone.0252466)
Supplement: S2 Dataset — (XLSX) [file pone.0252466.s006.xlsx]

## Sheet: Sheet1
GRID CELL	X coordinate centroid, British National Grid	Y coordinate centroid, British National Grid	Distance to seed source (wood or hedgerow) m	Common Ash 3-10 cm dbh (1.3 m)	Common Ash 10-30 cm dbh	Common Ash >= 30 cm dbh	Common Ash dead total	Oak 3-10 cm dbh (1.3 m)	Oak 10-30 cm dbh	Oak >= 30 cm dbh	Oak dead total	Field Maple 3-10 cm dbh (1.3 m)	Field Maple 10-30 cm dbh	Field Maple >= 30 cm dbh	Field Maple dead total	Willow 3-10 cm dbh (1.3 m)	Willow 10-30 cm dbh	Willow >= 30 cm dbh	Willow dead total	Elm 3-10 cm dbh (1.3 m)	Elm 10-30 cm dbh	Elm >= 30 cm dbh	Elm dead total	All trees	Hawthorn presence/absence	Blackthorn presence/absence	Rose presence/absence	Bramble presence/absence
A2	519669	279257	121.848	0	0	0	0	3	0	0	0	0	0	0	0	0	0	0	0	0	0	0	0	3	1	0	0	1
A3	519658	279274	121.162	0	0	0	0	5	0	0	0	0	0	0	0	0	0	0	0	0	0	0	0	5	1	1	1	0
A4	519647	279291	112.987	0	0	0	0	3	0	0	0	0	0	0	0	0	0	0	0	0	0	0	0	3	no data	no data	no data	no data
A5	519636	279307	93.3233	0	0	0	0	4	0	0	0	0	0	0	0	0	0	0	0	0	0	0	0	4	no data	no data	no data	no data
A6	519625	279324	73.7402	0	0	0	0	0	0	0	0	0	0	0	0	6	2	0	0	0	0	0	0	8	no data	no data	no data	no data
A7	519614	279340	53.5824	0	0	0	0	0	0	0	0	0	0	0	0	7	1	0	0	0	0	0	0	8	no data	no data	no data	no data
A8	519602	279357	33.4447	1	0	0	0	7	0	0	0	0	0	0	0	0	1	0	0	14	1	0	3	27	no data	no data	no data	no data
A9	519591	279374	13.1538	0	0	0	0	4	0	0	0	0	0	0	0	1	0	0	0	35	5	0	2	47	no data	no data	no data	no data
B1	519697	279252	102.726	1	0	0	0	0	0	0	0	0	0	0	0	0	0	0	0	0	0	0	0	1	no data	no data	no data	no data
B2	519686	279268	101.951	0	0	0	0	0	0	0	0	0	0	0	0	0	0	0	0	0	0	0	0	0	1	0	0	1
B3	519675	279285	101.134	1	0	0	0	1	0	0	0	0	0	0	0	0	0	0	0	0	0	0	0	2	1	0	0	1
B4	519664	279302	100.293	0	0	0	0	0	0	0	0	0	0	0	0	0	0	0	0	0	0	0	0	0	1	0	1	1
B5	519653	279318	93.1113	0	0	0	0	1	0	0	0	0	0	0	0	0	0	0	0	0	0	0	0	1	no data	no data	no data	no data
B6	519642	279334	73.4963	1	0	0	0	0	0	0	0	0	0	0	0	0	0	0	0	0	0	0	0	1	1	0	0	1
B7	519631	279351	53.3192	0	0	0	1	1	0	0	0	0	0	0	0	0	0	0	0	0	0	0	0	2	0	0	0	1
B8	519619	279368	33.1243	0	0	0	0	5	0	0	0	0	0	0	0	0	0	0	0	0	0	0	0	5	1	0	0	1
B9	519608	279385	12.8583	6	0	0	1	4	0	0	0	0	0	0	0	0	0	0	0	0	0	0	0	11	0	0	0	1
C1	519714	279262	82.4141	0	0	0	0	1	0	0	0	0	0	0	0	0	0	0	0	0	0	0	0	1	no data	no data	no data	no data
C2	519703	279279	81.6505	0	0	0	0	0	0	0	0	0	0	0	0	0	0	0	0	0	0	0	0	0	1	0	0	1
C3	519692	279296	80.8374	0	0	0	0	1	0	0	0	0	0	0	0	0	0	0	0	0	0	0	0	1	1	0	0	1
C4	519681	279312	80.0648	1	0	0	0	0	0	0	0	0	0	0	0	0	0	0	0	0	0	0	0	1	1	0	0	1
C5	519670	279329	79.5451	0	0	0	0	1	0	0	0	0	0	0	0	0	0	0	0	0	0	0	0	1	no data	no data	no data	no data
C6	519659	279345	73.2341	6	0	0	0	1	1	0	0	0	0	0	0	0	0	0	0	0	0	0	0	8	0	0	0	1
C7	519647	279362	53.0378	0	0	0	0	2	0	0	0	0	0	0	0	0	0	0	0	0	0	0	0	2	1	0	0	1
C8	519636	279379	32.7851	1	0	0	1	5	1	0	0	0	0	0	0	0	0	0	0	0	0	0	0	8	1	0	0	1
C9	519624	279395	12.5438	6	0	0	1	5	0	0	0	0	0	0	0	0	0	0	0	0	0	0	0	12	1	0	0	0
D1	519731	279274	62.0399	0	0	0	0	1	0	0	0	0	0	0	0	0	0	0	0	0	0	0	0	1	no data	no data	no data	no data
D2	519720	279290	61.328	0	0	0	0	0	0	0	0	0	0	0	0	0	0	0	0	0	0	0	0	0	no data	no data	no data	no data
D3	519709	279307	60.7668	0	0	0	0	2	0	0	0	0	0	0	0	0	0	0	0	0	0	0	0	2	no data	no data	no data	no data
D4	519698	279323	60.176	0	0	0	0	2	0	0	0	0	0	0	0	0	0	0	0	0	0	0	0	2	no data	no data	no data	no data
D5	519687	279339	59.6858	0	0	0	0	0	0	0	0	0	0	0	0	0	0	0	0	0	0	0	0	0	no data	no data	no data	no data
D6	519676	279356	59.2099	0	0	0	0	3	0	0	0	0	0	0	0	0	0	0	0	0	0	0	0	3	no data	no data	no data	no data
D7	519664	279372	52.7597	0	0	0	0	0	1	0	0	0	0	0	0	0	0	0	0	0	0	0	0	1	no data	no data	no data	no data
D8	519653	279389	32.4476	2	0	0	1	6	0	0	0	0	0	0	0	0	0	0	0	0	0	0	0	9	no data	no data	no data	no data
D9	519641	279406	12.23	3	0	0	1	15	0	0	0	0	0	0	0	1	0	0	0	0	0	0	0	20	no data	no data	no data	no data
E1	519748	279285	41.661	0	0	0	0	0	0	0	0	0	0	0	0	0	0	0	0	0	0	0	0	0	1	0	1	1
E2	519737	279301	41.1529	0	0	0	0	0	0	0	0	0	0	0	0	0	0	0	0	0	0	0	0	0	1	0	1	0
E3	519726	279318	40.5662	0	0	0	0	2	0	0	0	0	0	0	0	0	0	0	0	0	0	0	0	2	1	1	0	1
E4	519715	279334	40.0793	0	0	0	0	3	0	0	0	0	0	0	0	0	0	0	0	0	0	0	0	3	0	1	0	1
E5	519704	279350	39.5126	1	0	0	0	1	0	0	0	0	0	0	0	0	0	0	0	0	0	0	0	2	no data	no data	no data	no data
E6	519693	279367	38.9726	0	0	0	0	4	0	0	0	0	0	0	0	0	0	0	0	0	0	0	0	4	1	1	0	1
E7	519681	279383	38.3858	0	0	0	0	1	0	0	0	0	0	0	0	0	0	0	0	0	0	0	0	1	1	0	0	1
E8	519670	279400	32.1149	2	0	0	4	5	0	0	0	0	0	0	0	0	0	0	0	0	0	0	0	11	1	0	0	1
E9	519659	279417	11.92	5	0	0	1	5	1	0	0	0	0	0	0	0	0	0	0	0	0	0	0	12	0	0	0	1
F1	519765	279296	21.6466	1	0	0	0	7	1	0	0	0	0	0	0	0	0	0	0	0	0	0	0	9	1	1	0	1
F2	519754	279312	21.068	0	0	0	0	2	0	0	0	0	0	0	0	0	0	0	0	0	0	0	0	2	1	0	0	0
F3	519743	279329	20.5253	0	0	0	0	4	0	0	0	0	0	0	0	0	0	0	0	0	0	0	0	4	1	0	0	1
F4	519732	279345	19.8894	0	0	0	0	5	0	0	0	0	0	0	0	0	0	0	0	0	0	0	0	5	1	0	0	1
F5	519721	279361	19.3827	0	0	0	0	1	2	0	0	0	0	0	0	0	0	0	0	0	0	0	0	3	no data	no data	no data	no data
F6	519710	279377	18.8311	0	0	0	0	3	0	0	0	0	0	0	0	0	0	0	0	0	0	0	0	3	1	0	0	1
F7	519699	279394	18.2166	0	0	0	0	2	0	0	0	0	0	0	0	0	0	0	0	0	0	0	0	2	0	0	0	1
F8	519687	279411	17.5767	3	0	0	7	12	1	0	0	0	0	0	0	0	0	0	0	0	0	0	0	23	0	0	0	1
F9	519676	279428	11.6134	4	0	0	2	13	0	0	0	1	0	0	0	0	0	0	0	0	0	0	0	20	1	0	0	1
